# Supplementary material for: Gypenoside L inhibits autophagic flux and induces cell death in human esophageal cancer cells through endoplasm reticulum stress-mediated Ca2+ release
Source: PubMed Central journal article supplement (PMC5216949; doi:10.18632/oncotarget.10159), 2016-06-18
Supplement: oncotarget-07-47387-s001.pdf [file oncotarget-07-47387-s001.pdf]

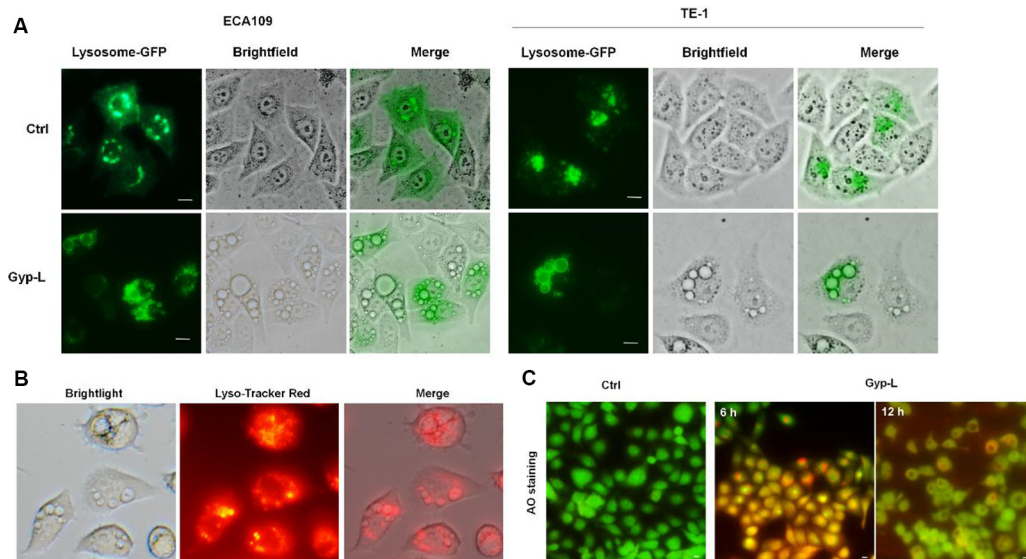

**Supplementary Figure S2: Gyp-L induces lysosomal swelling and dysfunction.** (A) ECA-109 or TE-1 cells were transfected with lysosome-GFP (LAMP1-GFP) for 24 h before treated with Gyp-L for 24 h. Images were captured using fluorescence microscope. Scale bar: 20  $\mu\text{m}$ . (B) Lyso-Tracker Red staining. Cells treated with Gyp-L for 24 h were stained with 50 nM Lyso-Tracker Red. (C) AO staining assay. ECA-109 cells were treated with Gyp-L (60  $\mu\text{g/ml}$ ) for 6 h or 12 h, and cells were washed, stained with AO (5  $\mu\text{g/ml}$ ) for 30 min. Fluorescence images were captured by fluorescence microscopy and representative photomicrographs were shown. Scale bar: 20  $\mu\text{m}$ .

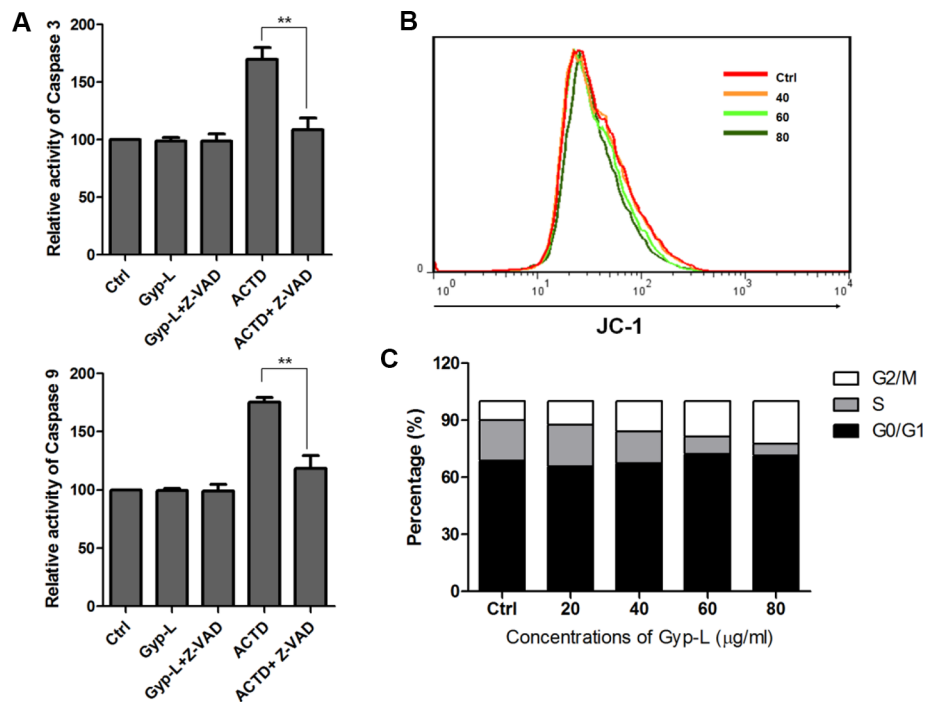

**Supplementary Figure S3: Gyp-L induces nonapoptotic cell death.** (A) After ECA-109 cells treated with Gyp-L (80  $\mu\text{g/ml}$ ) in the presence or absence of Z-VAD for 24 h, total cell lysates were extracted to measure the activity of caspase 3 or caspase 9. Dactinmycin (ACTD) (0.75  $\mu\text{g/ml}$ ), a mRNA synthesis inhibitor, was used as a positive control. (B) ECA-109 cells were treated with Gyp-L for 12 h and mitochondrial membrane potential was measured by Flow cytometry using JC-1 staining. (C) Effects of Gyp-L on cell cycle distribution. ECA-109 Cells were treated with 0, 20, 40, 60 and 80  $\mu\text{g/ml}$  Gyp-L for 24 h, fixed in 70% ethanol, stained with PI, and cell cycle distribution was assessed by flow cytometry. The percentage of cells in each cell cycle phase is indicated as the mean  $\pm$  SD of three independent experiments.

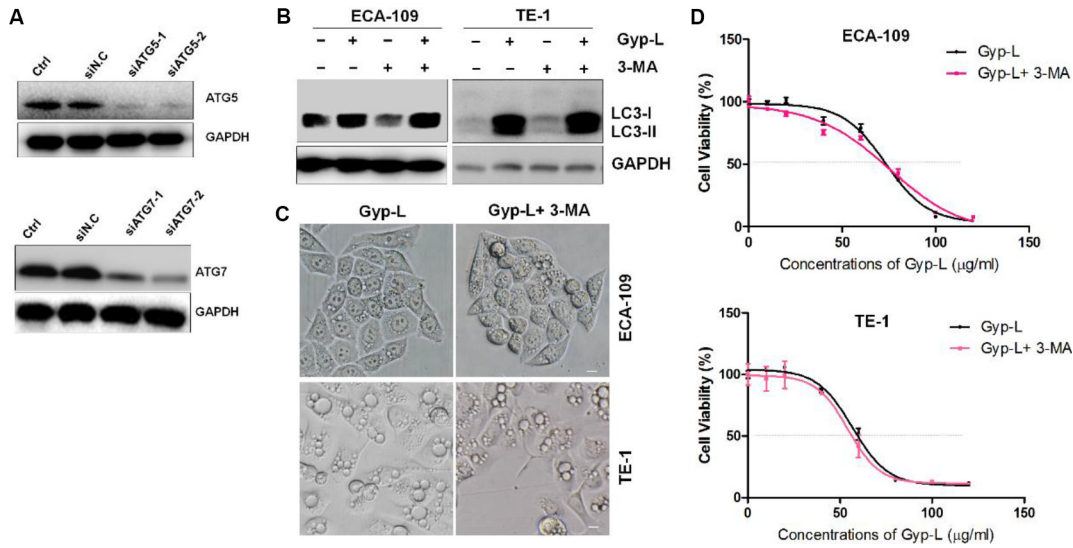

**Supplementary Figure S4: Effect of 3-MA on Gyp-L-induced cell death.** (A) Efficiency of knockdown of ATG5 and ATG7. (B) ECA-109 and TE-1 cells were treated with Gyp-L in the presence or absence of 3-MA (10 mM) for 12 h, and cell lysates were subjected to western blot for LC3-II and p62. (C–D) 3-MA dose not inhibit Gyp-L-induced cytoplasmic vacuoles and cell death. ECA-109 or TE-1 cells were treated with Gyp-L and 3-MA for 24 h and cell viability was measured with the MTT assay.

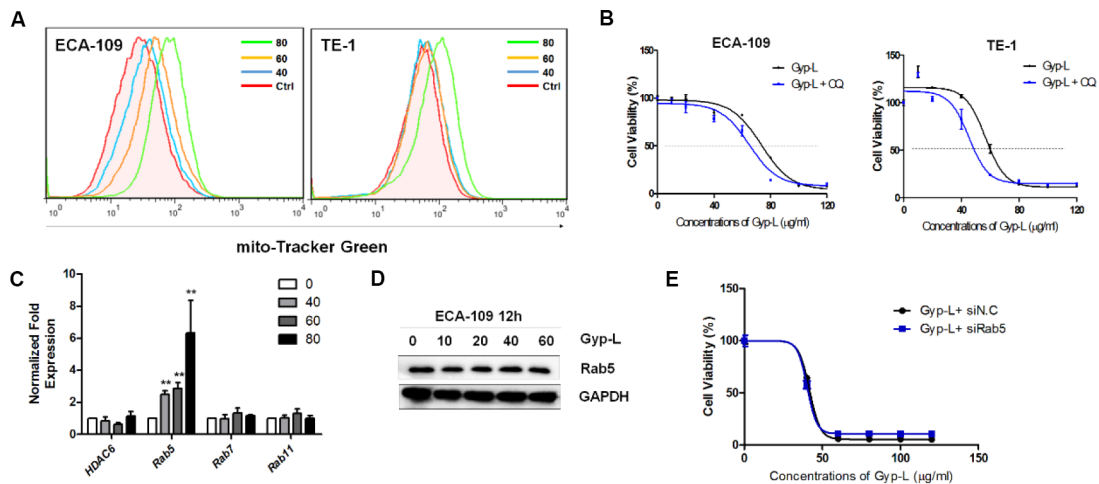

**Supplementary Figure S5: Gyp-L inhibits autophagic flux.** (A) Effect of Gyp-L on mitochondrial mass. (B) CQ rendered cancer cells more sensitive to the cytotoxicity of Gyp-L. ECA-109 or TE-1 cells were treated with Gyp-L in the presence or absence of CQ for 24 h. (C) Expression of several lysosomal positioning genes. ECA-109 cells were treated with Gyp-L (60 μg/ml) for 12 h and the total RNA was extracted. A quantitative real-time PCR (RT-PCR) was performed to determine the mRNA levels of *RAB5*, *RAB7*, *RAB11* and *HDAC6*. Data presented are representative of three independent experiments. (D) ECA-109 cells were treated with Gyp-L for 12 h and cell lysates were subject to western blot for RAB5 and GAPDH. (E) ECA-109 cells were transfected with siRNA targeting RAB5 for 24 before treated with Gyp-L for another 24 h. Cell viability was measured with the MTT assay.

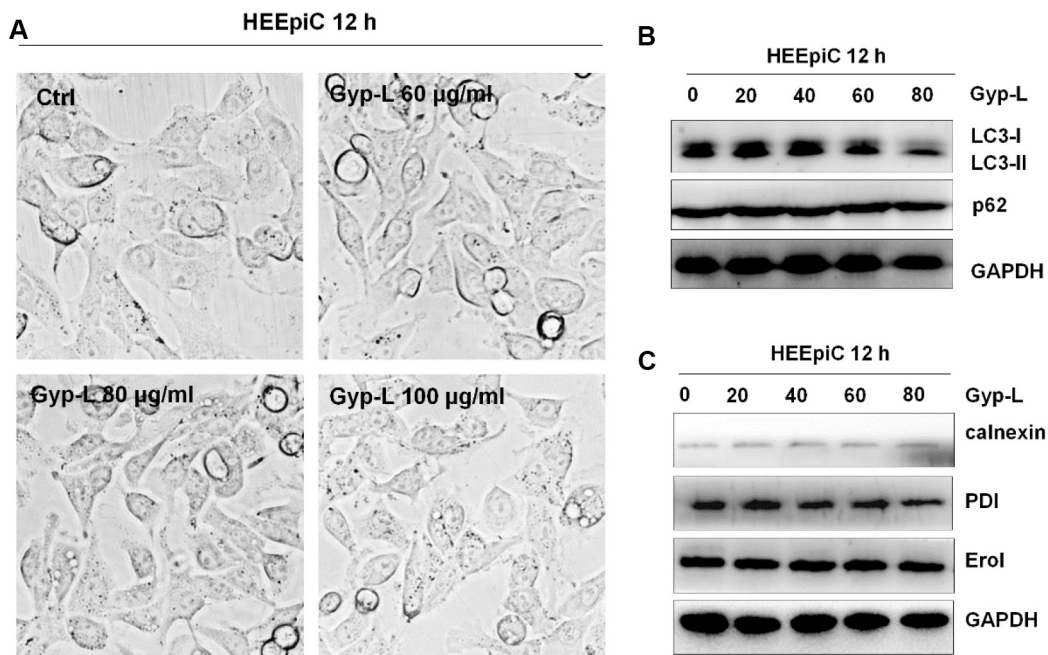

**Supplementary Figure S6: Normal HEePiC cells are protected from Gyp-L-induced cytotoxic effects.** (A) HEeC cells were treated with Gyp-L for 12 h. (B) Western blots of total cell lysates on the expression of LC3-II and p62. (C) Western blots of total cell lysates on the expression of ER stress-related proteins.

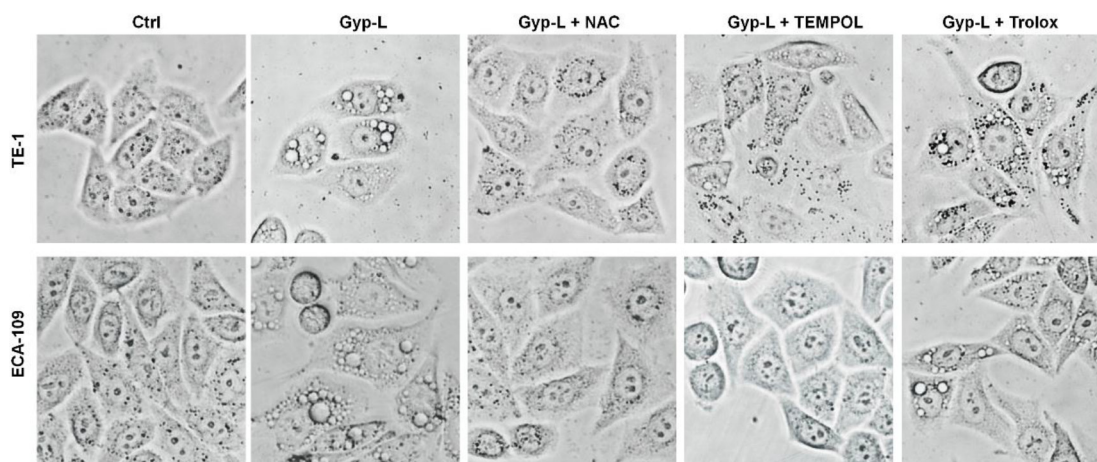

**Supplementary Figure S7: Effect of ROS scavenger on Gyp-L-induced cytoplasmic vacuolation.** ECA-109 or TE-1 cells were treated with Gyp-L in the presence or absence of NAC (5 mM), TEMPOL (2 mM), Trolox (1 mM) for 12 h.

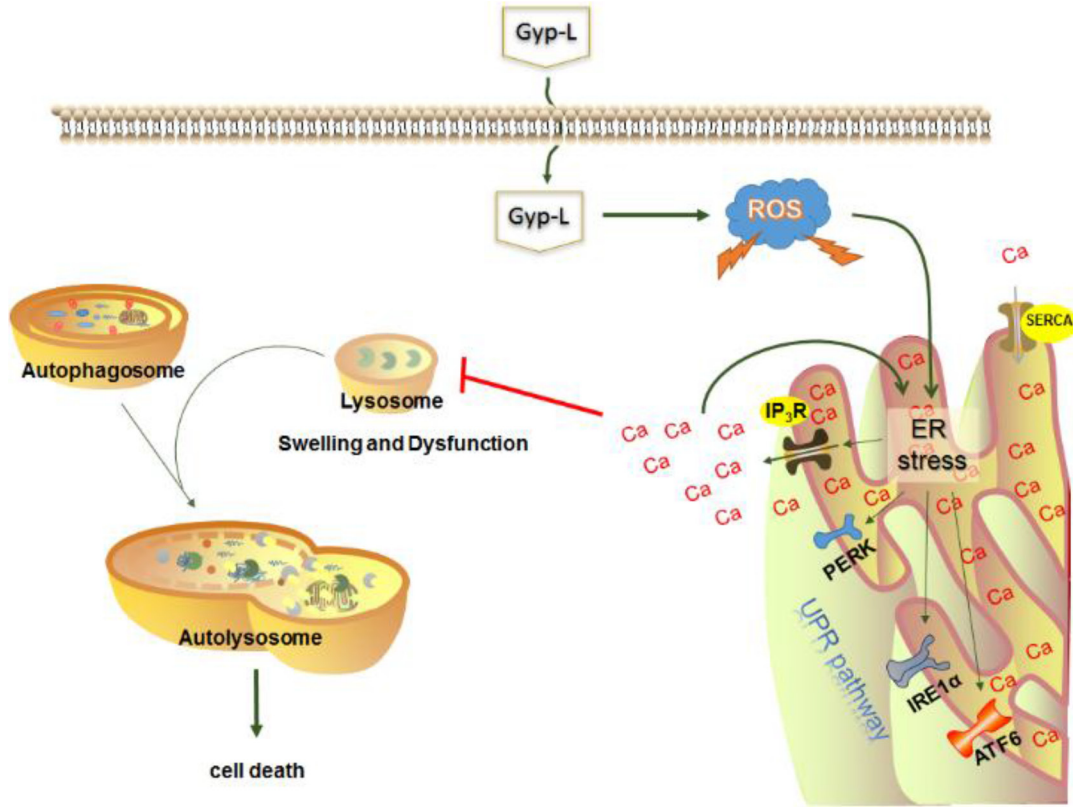

**Supplementary Figure S8: Proposed mechanism by which Gyp-L inhibits autophagic flux and induces cell death in esophageal cancer cells.** Gyp-L initially increases the intracellular ROS production, and subsequently causes the ER stress, UPR pathway activation, and Ca<sup>2+</sup> release from ER. Then the increased cytoplasm Ca<sup>2+</sup> induces the swelling and dysfunction of lysosomes, leading to the inhibition of autophagic flux and finally lysosome-associated cell death.

### Supplementary Table S1: primers of RT-PCR

| Genes | Sequences                           |
|-------|-------------------------------------|
| HDAC6 | Forward: CCACAACCAGGCAGGCAGCGAAGAAG |
|       | Reverse: ATCCATCCCTTGCAGTCCCACG     |
| SERCA | Forward: TCAAGGGAGTTCAATGTGCCCTCT   |
|       | Reverse: AAGGTGGCATGACCAGCATAGACT   |
| RAB5  | Forward: ACCACCGCCATAGATACTCTCA     |
|       | Reverse: ACTAGGCTTGATTTGCCAACAGCG   |
| RAB7  | Forward: AGTTCCTGGAACCAGAACTTGGA    |
|       | Reverse: TGTGACTAGCCTGTCATCCACCAT   |
| RAB11 | Forward: GGAAAGCAAGAGCACCATTGGAGT   |
|       | Reverse: TTTGTAGAGTCTAGGGCCGAAGTTTC |
| IP3R1 | Forward: TGACGAGAACCTGCCCTAT        |
|       | Reverse: TCCTTTCGCCATCTTGCT         |
| GAPDH | Forward: AGCCTCAAGATCATGAGCAATG     |
|       | Reverse: TCACGATACCAAAGTTGTCATGGA   |

### Supplementary Table S2: siRNA sequences

| Gene   | Sense (5'-3')       | Antisense (5'-3')   |
|--------|---------------------|---------------------|
| LC3-1  | AGCUGUGGAUGAUCCACGU | ACGUGGAUCAUCCACAGCU |
| ATG5-1 | GGAUGCAAUUGAAGCUCAU | AUGAGCUUCAUUGCAUCC  |
| ATG5-2 | GUUGGUCAAAGACCAGAU  | UAUCUGGUCUUUGACCAAC |
| ATG7-1 | CCCUGUACUCCUCAACAAG | CUUGUUGAGGAGUACAGGG |
| ATG7-2 | GUACCACUUCUACUAUUGG | CCAAUAGUAGAAGUGGUAC |
